# Supplementary material for: Integrated Analyses of Microbiome and Longitudinal Metabolome Data Reveal Microbial-Host Interactions on Sulfur Metabolism in Parkinson’s Disease
Source: PubMed Central journal article supplement (PMC6856723; doi:10.1016/j.celrep.2019.10.035), 2019-11-12
Supplement: mmc1.pdf [file mmc1.pdf]

Cell Reports, Volume 29

## Supplemental Information

### **Integrated Analyses of Microbiome and Longitudinal Metabolome Data Reveal Microbial-Host Interactions on Sulfur Metabolism in Parkinson's Disease**

**Johannes Hertel, Amy C. Harms, Almut Heinken, Federico Baldini, Cyrille C. Thinnes, Enrico Glaab, Daniel A. Vasco, Maik Pietzner, Isobel D. Stewart, Nicholas J. Wareham, Claudia Langenberg, Claudia Trenkwalder, Rejko Krüger, Thomas Hankemeier, Ronan M.T. Fleming, Brit Mollenhauer, and Ines Thiele**

**Table S1: Sample description DeNoPa cohort, Related to Star Methods (EXPERIMENTAL MODEL AND SUBJECT DETAILS)**

|                                                                         | Controls      | Cases         | p-value             |
|-------------------------------------------------------------------------|---------------|---------------|---------------------|
| Age <sup>a</sup> , mean (sd)                                            | 64.37(7.59)   | 64.00(8.49)   | 0.86 <sup>b</sup>   |
| Female, %                                                               | 50%           | 50%           | 1.00 <sup>c</sup>   |
| Length of disease in months <sup>a</sup> , median (interquartile-range) | -             | 12(9-24)      | -                   |
| BMI, mean(sd)                                                           |               |               |                     |
| Baseline                                                                | 27.59(4.68)   | 27.47(5.22)   | 0.926 <sup>b</sup>  |
| Follow-up 1                                                             | 27.54(4.96)   | 28.37(5.07)   | 0.522 <sup>b</sup>  |
| Follow-up II                                                            | 28.06(6.10)   | 27.83(4.69)   | 0.875 <sup>b</sup>  |
| Serum creatinine, mean(sd)                                              |               |               |                     |
| Baseline                                                                | 0.84(0.029)   | 0.91(0.036)   | 0.136 <sup>b</sup>  |
| Follow-up 1                                                             | 0.86(0.031)   | 0.92(0.038)   | 0.241 <sup>b</sup>  |
| Follow-up II                                                            | 0.86(0.031)   | 0.89(0.035)   | 0.473 <sup>b</sup>  |
| Serum GGT, mean(sd)                                                     |               |               |                     |
| Baseline                                                                | 35.24(5.01)   | 39.7(7.67)    | 0.629 <sup>b</sup>  |
| Follow-up 1                                                             | 35.7(4.81)    | 44.97(6.39)   | 0.251 <sup>b</sup>  |
| Follow-up II                                                            | 36.37(7.39)   | 50.21(10.97)  | 0.300 <sup>b</sup>  |
| Total triglycerides, mean(sd)                                           |               |               |                     |
| Baseline                                                                | 120.10(9.29)  | 117.57(8.86)  | 0.844 <sup>b</sup>  |
| Follow-up 1                                                             | 143.91(14.31) | 138.90(17.72) | 0.827 <sup>b</sup>  |
| Follow-up II                                                            | 134.17(16.68) | 117.89(11.66) | 0.427 <sup>b</sup>  |
| Levodopa, %                                                             |               |               |                     |
| Baseline                                                                | 0%            | 10%           | 0.237 <sup>c</sup>  |
| Follow-up 1                                                             | 0%            | 53.3%         | <0.001 <sup>c</sup> |
| Follow-up II                                                            | 0%            | 83.3%         | <0.001 <sup>c</sup> |
| 3-O-methyldopa levels <sup>d</sup> , mean(sd)                           |               |               |                     |
| Baseline                                                                | 0.18 (0.03)   | 1.20(0.8)     | 0.267 <sup>b</sup>  |
| Follow-up 1                                                             | 0.18 (0.03)   | 18.79(26.84)  | <0.001 <sup>b</sup> |
| Follow-up II                                                            | 0.19 (0.04)   | 30.34(28.67)  | <0.001 <sup>b</sup> |
| UPDRS score, mean(sd)                                                   |               |               |                     |
| Baseline                                                                | 1.2(1.73)     | 29.93(16.55)  | <0.001 <sup>b</sup> |
| Follow-up 1                                                             | 3.47(5.51)    | 35.83(21.42)  | <0.001 <sup>b</sup> |

|              |            |              |                     |
|--------------|------------|--------------|---------------------|
| Follow-up II | 3.63(3.85) | 40.73(21.07) | <0.001 <sup>b</sup> |
|--------------|------------|--------------|---------------------|

BMI=body mass index, UPDRS=Unified Parkinson Disease Rating Scale, SD=standard deviation, GGT=Gamma-glutamyl-transferase

a  
at baseline

b  
p-value from welch t-test (robust against variance inhomogeneity)

c  
p-value from Fisher's exact test

d  
relative values against internal standard (unit-free)

**Table S2: Longitudinal description of the UPDRS subscales. Related to Star Methods (EXPERIMENTAL MODEL AND SUBJECT DETAILS)**

| Scale     | Description                          | Control group      |                       |                        |      |            | Parkinson's disease group |                       |                        |      |            |
|-----------|--------------------------------------|--------------------|-----------------------|------------------------|------|------------|---------------------------|-----------------------|------------------------|------|------------|
|           |                                      | Baseline, mean(sd) | Follow-up I, mean(sd) | Follow-up II, mean(sd) | ICC  | p-val*     | Baseline, mean(sd)        | Follow-up I, mean(sd) | Follow-up II, mean(sd) | ICC  | p-val *    |
| UPDRS_I   | nonmotor experiences of daily living | .4(.968)           | .867(1.961)           | .867(1.252)            | 0,74 | 0,02245441 | 2.233(1.591)              | 2.733(2.651)          | 2.867(2.813)           | 0,42 | 0,76361817 |
| UPDRS_II  | motor experiences of daily living    | .167(.379)         | 1.233(2.269)          | 1.033(1.299)           | 0,11 | 0,00495283 | 7.6(4.256)                | 9.567(5.532)          | 11.3(7.023)            | 0,4  | 0,02516821 |
| UPDRS_III | motor examination                    | .633(1.066)        | 1(1.722)              | 1.1(2.04)              | 0,31 | 0,38386512 | 20(11.99)                 | 21.83(14.02)          | 23.6(12.90)            | 0,58 | 0,25066236 |
| UPDRS_IV  | motor complications                  | 0(0)               | .367(.556)            | .633(.615)             | 0,05 | 0,19991027 | .1(.305)                  | 1.7(1.685)            | 2.967(1.974)           | 0,27 | 2,1072E-07 |
| UPDRS sum | total sum of the subscales           | 1.2(1.73)          | 3.467(5.507)          | 3.633(3.855)           | 0,39 | 0,00347403 | 29.93(16.55)              | 35.83(21.42)          | 40.73(21.07)           | 0,55 | 0,00688026 |

\* p-value for change of scores over time from generalized linear (ordered logistic for scales I, II, and IV; linear for III and total sum) mixed effect regression models on sum scores with random intercepts for individuals

UPDRS=Unified Parkinson's Disease Rating Scale, SD=standard deviation, ICC= Intra-class correlation (estimates from mixed effect linear regression models)

**Table S3: Extended results on associations of taurine conjugated bile acids and histidine with UPDRS scores, Related to Figure 3**

| Scale                                | Metabolite             | OR per SD(95%-CI)            | p-val main-effect        | p-val wave-metabolite interaction terms        | p-val (global test)        |
|--------------------------------------|------------------------|------------------------------|--------------------------|------------------------------------------------|----------------------------|
| Nonmotor experiences of daily living | Glycochenodeoxycholate | 1.01(.563,1.83)              | 0,958354592              | 0,720970213                                    | 0,867364049                |
|                                      | Taurodeoxycholate      | 1.03(.541,1.96)              | 0,927205324              | 0,580307126                                    | 0,77228117                 |
|                                      | Tauroolithocholate     | 1.13(.634,2.03)              | 0,667679131              | 0,418939978                                    | 0,577265501                |
|                                      | Taurochenodeoxycholate | .883(.477,1.63)              | 0,692703664              | 0,05119082                                     | 0,097403519                |
|                                      | Histidine              | 1.33(.772,2.30)              | 0,301499635              | 0,050487068                                    | 0,062795445                |
| Motor experiences of daily living    | Glycochenodeoxycholate | 1.57(.888,2.79)              | 0,11999502               | 0,584910095                                    | 0,32993114                 |
|                                      | Taurodeoxycholate      | 1.66(.885,3.12)              | 0,113711871              | 0,191467807                                    | 0,128062218                |
|                                      | Tauroolithocholate     | 1.82(1.06,3.13)              | 0,029512389              | 0,770044744                                    | 0,162961528                |
|                                      | Taurochenodeoxycholate | 1.09(.614,1.95)              | 0,756966412              | 0,000928063                                    | 0,002848896                |
|                                      | Histidine              | .877(.514,1.49)              | 0,631691098              | 0,001826344                                    | 0,004779307                |
| Motor complications                  | Taurodeoxycholate      | 1.16(.503,2.69)              | 0,721189737              | 0,507050216                                    | 0,681357145                |
|                                      | Tauroolithocholate     | 1.43(.573,3.59)              | 0,440891027              | 0,718772769                                    | 0,71991986                 |
|                                      | Taurochenodeoxycholate | .965(.387,2.40)              | 0,939195514              | 0,500429034                                    | 0,705573976                |
|                                      | Histidine              | .797(.354,1.79)              | 0,583696365              | 0,534434259                                    | 0,694207132                |
|                                      |                        | <b>b per SD(95%-CI)</b>      | <b>p-val main-effect</b> | <b>p-val wave-metabolite interaction terms</b> | <b>p-val (global test)</b> |
| Motor examination                    | Glycochenodeoxycholate | <b>4.5414(2.1831,6.8998)</b> | <b>0,000160446</b>       | 0,752375066                                    | <b>3,85941E-05</b>         |
|                                      | Taurodeoxycholate      | <b>5.0123(2.4393,7.5853)</b> | <b>0,000134488</b>       | 0,459485054                                    | <b>9,54299E-06</b>         |
|                                      | Tauroolithocholate     | <b>4.8466(2.5879,7.1054)</b> | <b>2,60499E-05</b>       | 0,455995142                                    | <b>4,40051E-06</b>         |
|                                      | Taurochenodeoxycholate | <b>2.9977(.39110,5.6044)</b> | <b>0,024193915</b>       | <b>0,020852594</b>                             | <b>0,000546943</b>         |
|                                      | Histidine              | .10647(-2.902,3.1151)        | 0,944701612              | <b>2,12226E-05</b>                             | <b>8,17327E-05</b>         |
| Total sum                            | Glycochenodeoxycholate | <b>5.8812(2.4093,9.3530)</b> | <b>0,000899738</b>       | 0,888717771                                    | <b>0,000527866</b>         |
|                                      | Taurodeoxycholate      | <b>6.5909(2.5434,10.638)</b> | <b>0,001414916</b>       | 0,432464212                                    | <b>0,000253226</b>         |
|                                      | Tauroolithocholate     | <b>6.3847(3.0044,9.7650)</b> | <b>0,000213873</b>       | 0,783009708                                    | <b>0,000685799</b>         |
|                                      | Taurochenodeoxycholate | 3.5190(-.3835,7.4216)        | 0,077174589              | <b>0,003579476</b>                             | <b>0,000878645</b>         |
|                                      | Histidine              | .21928(-4.262,4.7014)        | 0,923608303              | <b>1,13654E-05</b>                             | <b>3,50652E-05</b>         |

SD=standard deviation, CI=confidence interval, UPDRS=Unified Parkinson's Disease Rating Scale. Estimates from mixed effect generalized linear regression (ordered logistic for subscales I, II and IV; linear for subscale III and total sum) with random intercepts for subject. All analyses adjusted for age, sex, length of disease, levodopa intake, levodopa dose and wave (categorical). In bold, FDR<0.05 for association with total UPDRS score, global test

OR=odds ratio, CI=confidence interval, SD=standard deviation, BL=baseline, FU1=follow-up I, FU2=follow-up II, UPDRS=Unified Parkinson Disease Rating Scale, TLCA=tauroolithocholic acid, TCDCA=taurochenodeoxycholic acid, TDCA=taurodeoxycholic acid.

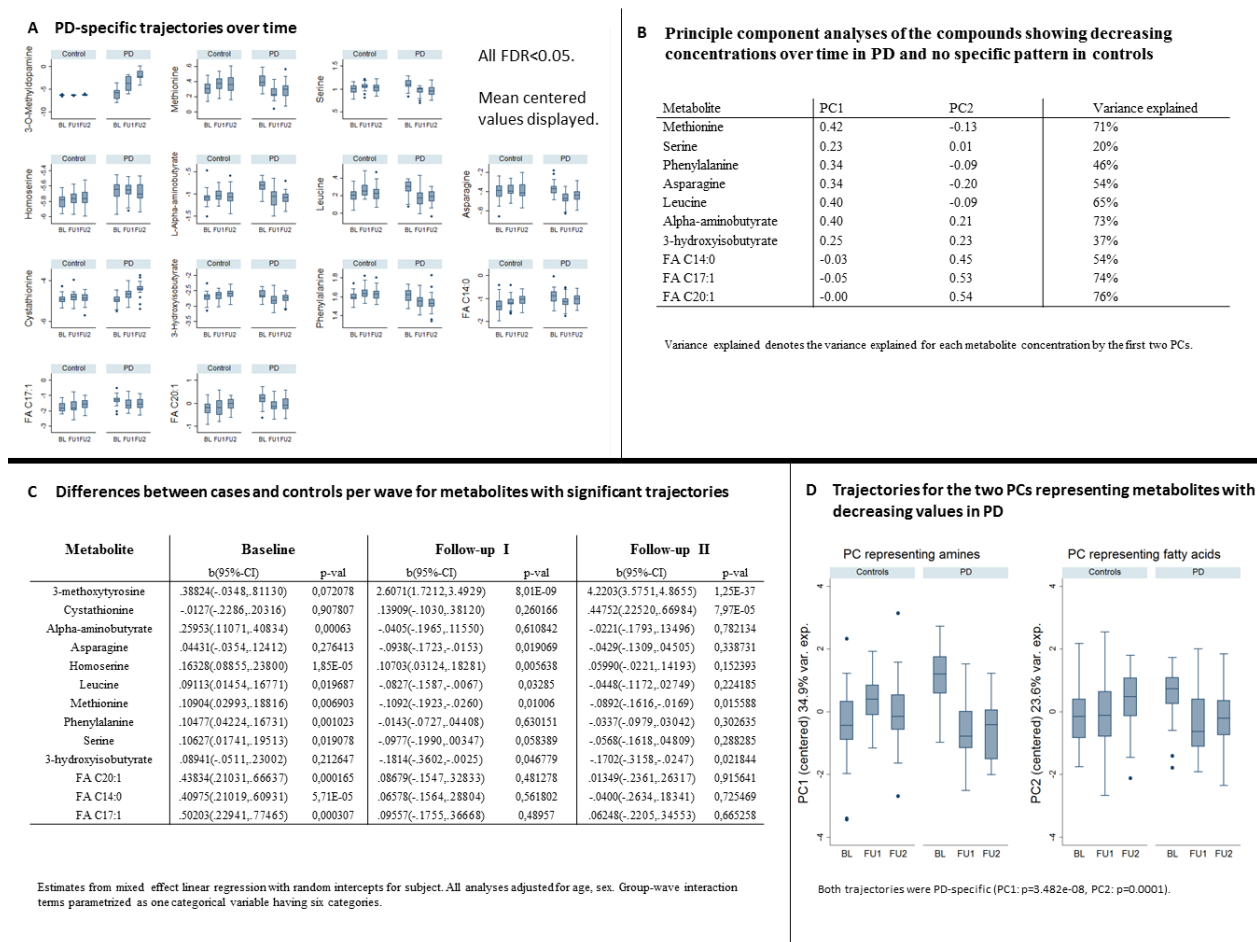

**Figure S1: PD-specific trajectories over time, Related to Figure 2.** **A** Box plots of log transformed metabolite concentrations over the three waves for controls and PD cases. Metabolite concentrations are displayed after mean centering per individual, showing therefore the intra-individual variation over the waves for controls and PD cases. **B** Principle component analyses of the compounds showing decreasing concentrations over time in PD and no specific pattern in controls. **C** Differences between cases and controls per wave for metabolites with significant trajectories. **D** Trajectories for the two PCs representing metabolites with decreasing values in PD. Both trajectories were PD-specific (PC1: p=3.482e-08, PC2: p=0.0001). FA=fatty acids, BL=baseline, FU1=follow-up 1, FU2=follow-up 2, PC=principle component.

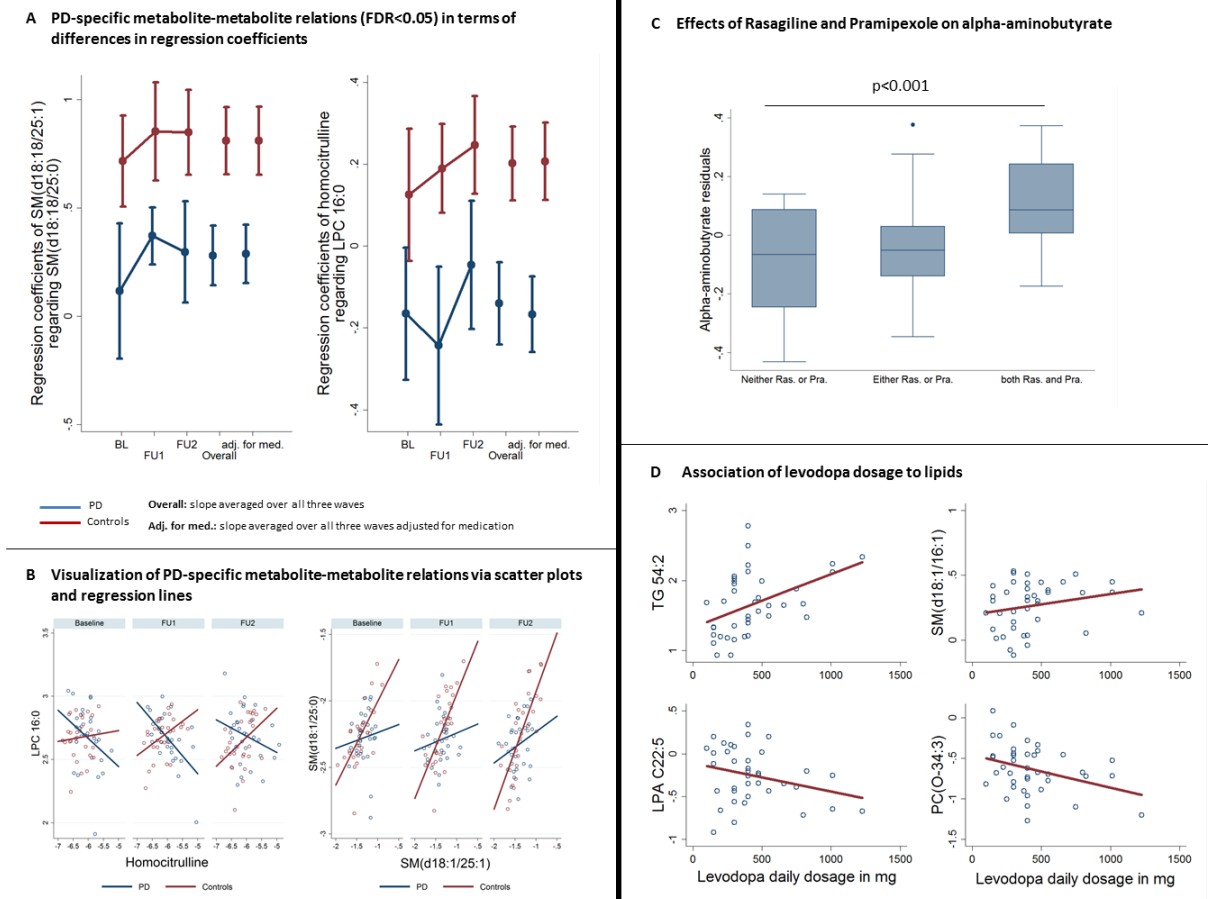

**Figure S2: Extended results regarding metabolite-metabolite relations and effects of dopaminergic medication, Related to Figure 3.** **A** Altered metabolite-metabolite associations with FDR<0.05. The regression coefficients (adjusted for age, sex, wave, group and wave-group interaction terms) and their confidence intervals are depicted for each wave, and averaged over all three waves. Adjustment for medication includes the levodopa equivalent dosage, pramipexole, rasagiline and levodopa intake. **B** Scatter plots for LPC 16:0 in dependency on homocitrulline, and SM(d18:1/25:0) in dependency on SM(d18:1/25:1) with corresponding regression lines stratified for wave. Red indicates control, blue PD. **C** Combined effects of Rasagiline and Pramipexole on alpha-aminobutyrate levels. **D** Association of levodopa dosages to diverse lipids displayed by scatter plots and corresponding regression lines. All associations were significant after multiple testing FDR<0.05. SM=Sphingomyelin, LPC=lysophosphatidylcholine, TG=triglycerides, LPA=lysphosphatic acid, PC=phosphatidylcholine, BL=baseline, FU1=follow-up 1, FU2=follow-up 2.

**A Tested secretion potential of microbial communities regarding differences between PD and controls**

| Secreted metabolite | b(95%-CI)              | p-value  | FDR      |
|---------------------|------------------------|----------|----------|
| Methionine          | .49845(.25013, .74676) | 8,34E-05 | 0,000667 |
| Hydrogen sulfide    | .57589(.20729, .94449) | 0,002197 | 0,008789 |
| Sulfite             | .81821(.22327, 1.4131) | 0,007028 | 0,018742 |
| Asparagine          | -.0704(-.1277, .0131)  | 0,016029 | 0,032059 |
| Aspartate           | .08454(-.0265, .19561) | 0,135708 | 0,217133 |
| Serine              | -.0420(-.1039, .01988) | 0,183381 | 0,244508 |
| Cysteine            | .00901(-.1756, .19367) | 0,923814 | 1        |
| Glutathionine       | .00003(-.0005, .00059) | 0,916499 | 1        |

CI=confidence interval FDR=false discovery rate  
 Estimates from linear regressions using the group variable as the sole predictor with bootstrap-derived confidence intervals using 2000 replications.

**B Log *Akkermansia muciniphila* abundance and log secretion potentials of methionine, hydrogen sulfide, asparagine and sulfate**

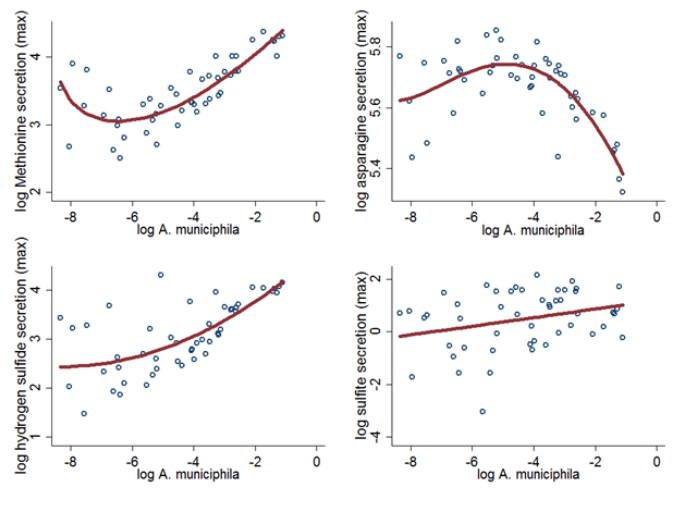

**Figure S3: Extended results of metagenomics analyses, Related to Figure 4. A** Secretion potentials in transsulfuration pathway from metabolic modeling of metagenomic data. **B** Secretion potentials in dependency on *akkermansia muciniphila* abundance. Red line shows the polynomial fit.
